# Supplementary material
Source: publisher figshare collection journal article supplement (https://tandf.figshare.com/articles/dataset/_/6809792)
Supplement: Supplementary file 2 [file 2]

Archive with 2 entries (2 files):
- 2017AUTO0313R2-s01.docx
- Suppl.pdf
